# Supplementary material for: Driving factors of runoff and sediment yield effects of various slope ecological restoration measures in the middle reaches of the Yellow River
Source: PeerJ journal article supplement (doi:10.7717/peerj.20040), 2025-09-19
Supplement: Data.xlsx [file Data.xlsx]

## Sheet: Sheet1
Arbor forest land	Rainfall /mm	T /min	Iavg /（mm/h）	I30 /（mm/h）	gradient	run-off depth /mm	runoff coefficient	sediment concentration /（g/L）	soil loss amount /（t/hm2）
Ⅰ	34.5	360	5.8	17	15	0.5	0.01	1.95	0.01
Ⅱ	16	680	1.4	13	15	0.45	0.03	1.45	0.03
Ⅰ	13.5	110	7.4	52	15	0.3	0.02	1.38	0.02
Ⅱ	38.2	765	1.51	26.58	15	0.8	0.02	2.93	0.04
Ⅰ	61.2	418	8.8	42.4	15	3.9	0.06	3.92	15.12
Ⅰ	30.4	130	14	18.5	15	0.49	0.02	2.91	0.03
Ⅰ	34.5	360	5.8	17	10	0.2	0.01	0.25	0
Ⅱ	16	680	1.4	13	10	1.8	0.12	0.28	0.01
Ⅰ	13.5	110	7.4	52	10	0.6	0.04	2	0.01
Ⅱ	38.2	765	1.51	26.58	10	0.2	0.01	1.95	0.02
Ⅰ	61.2	418	8.8	42.4	10	0	0	0	0
Ⅰ	30.4	130	14	18.5	10	0	0	0	0
Ⅰ	34.5	360	5.8	17	5	0	0	0	0
Ⅱ	16	680	1.4	13	5	0	0	0	0
Ⅰ	13.5	110	7.4	52	5	0	0	0	0
Ⅱ	38.2	765	1.51	26.58	5	0.2	0.01	1.04	0.01
Ⅰ	61.2	418	8.8	42.4	5	0	0	0	0
Ⅰ	30.4	130	14	18.5	5	0	0	0	0
Shrub grass land	Rainfall /mm	T /min	Iavg /（mm/h）	I30 /（mm/h）	gradient	run-off depth /mm	runoff coefficient	sediment concentration /（g/L）	soil loss amount /（t/hm2）
Ⅰ	34.5	360	5.8	17	15	0.70336	0.0203872	2.83	0.0199051
Ⅱ	16	680	1.4	13	15	0.5	0.03125	2.11	1.30707
Ⅰ	13.5	110	7.4	52	15	0.5	0.037037	2.44	1.21902
Ⅱ	38.2	765	1.51	26.58	15	1.3	0.0340314	3.5	1.53
Ⅰ	61.2	418	8.8	42.4	15	4.85	0.0792484	17.06	31.6
Ⅰ	30.4	130	14	18.5	15	0.60288	0.0198316	3.83	0.0230903
Ⅰ	34.5	360	5.8	17	10	0.5	0.0144928	2.4	0.02
Ⅱ	16	680	1.4	13	10	0.5	0.03125	2	1.03789
Ⅰ	13.5	110	7.4	52	10	0.4	0.0296296	1.68	1.315
Ⅱ	38.2	765	1.51	26.58	10	1.3	0.0340314	3.85	1.115
Ⅰ	61.2	418	8.8	42.4	10	1.55	0.0253268	13.14	20.34
Ⅰ	30.4	130	14	18.5	10	0.10048	0.00330526	0.67	0.000673216
Ⅰ	34.5	360	5.8	17	5	0	0	0	0
Ⅱ	16	680	1.4	13	5	0	0	0	0
Ⅰ	13.5	110	7.4	52	5	0	0	0	0
Ⅱ	38.2	765	1.51	26.58	5	0.8	0.0209424	3.29	0.051
Ⅰ	61.2	418	8.8	42.4	5	2.8	0.0457516	16.29	0.051
Ⅰ	30.4	130	14	18.5	5	0	0	0	0
Natural grassland	Rainfall /mm	T /min	Iavg /（mm/h）	I30 /（mm/h）	gradient	run-off depth /mm	runoff coefficient	sediment concentration /（g/L）	soil loss amount /（t/hm2）
Ⅰ	34.5	360	5.8	17	15	3.16077	0.0916165	3.48	0.85
Ⅱ	16	680	1.4	13	15	3.90912	0.24432	14.07	0.787571
Ⅰ	13.5	110	7.4	52	15	2.91656	0.216041	13.3	0.458201
Ⅱ	38.2	765	1.51	26.58	15	7.5	0.196335	4.79	0.9614
Ⅰ	61.2	418	8.8	42.4	15	16.65	0.272059	49.39	52.83
Ⅰ	30.4	130	14	18.5	15	6.95456	0.228768	2.95	0.123616
Ⅰ	34.5	360	5.8	17	10	3	0.0869565	3	0.6
Ⅱ	16	680	1.4	13	10	3.42848	0.21428	1.77	0.151564
Ⅰ	13.5	110	7.4	52	10	2.17952	0.161446	10.93	0.579353
Ⅱ	38.2	765	1.51	26.58	10	7	0.183246	12.69	0.568
Ⅰ	61.2	418	8.8	42.4	10	1.27	0.0207516	4.78	0.99
Ⅰ	30.4	130	14	18.5	10	6.2512	0.205632	2.06	0.00517472
Ⅰ	34.5	360	5.8	17	5	0.130624	0.0037862	0.8	0.00104499
Ⅱ	16	680	1.4	13	5	0	0	0	0
Ⅰ	13.5	110	7.4	52	5	0	0	0	0
Ⅱ	38.2	765	1.51	26.58	5	5.4	0.141361	82.69	0.315
Ⅰ	61.2	418	8.8	42.4	5	0	0	0	0
Ⅰ	30.4	130	14	18.5	5	0	0	0	0
Artificial grassland	Rainfall /mm	T /min	Iavg /（mm/h）	I30 /（mm/h）	gradient	run-off depth /mm	runoff coefficient	sediment concentration /（g/L）	soil loss amount /（t/hm2）
Ⅰ	34.5	360	5.8	17	15	3.1	0.0898551	3.26	0.8
Ⅱ	16	680	1.4	13	15	3.69078	0.230674	14.64	0.53996
Ⅰ	13.5	110	7.4	52	15	2.09408	0.155117	14.59	0.720849
Ⅱ	38.2	765	1.51	26.58	15	8.3	0.217277	3.1	0.9
Ⅰ	61.2	418	8.8	42.4	15	16.38	0.267647	38.5	35.5
Ⅰ	30.4	130	14	18.5	15	7.10048	0.233568	2.2	0.00221056
Ⅰ	34.5	360	5.8	17	10	2	0.057971	3	0.5
Ⅱ	16	680	1.4	13	10	3.63034	0.226896	12.86	0.786098
Ⅰ	13.5	110	7.4	52	10	1.87808	0.139117	8.86	0.490741
Ⅱ	38.2	765	1.51	26.58	10	7	0.183246	2.41	1.347
Ⅰ	61.2	418	8.8	42.4	10	11.55	0.188725	5.29	31.12
Ⅰ	30.4	130	14	18.5	10	1.10528	0.0363579	2.52	0.0278531
Ⅰ	34.5	360	5.8	17	5	1.8	0.0521739	2.7	0.48
Ⅱ	16	680	1.4	13	5	0	0	0	0
Ⅰ	13.5	110	7.4	52	5	0	0	0	0
Ⅱ	38.2	765	1.51	26.58	5	13.2	0.34555	342.41	1.535
Ⅰ	61.2	418	8.8	42.4	5	0.14	0.00228758	2.28	0.32
Ⅰ	30.4	130	14	18.5	5	0	0	0	0
Bare land	Rainfall /mm	T /min	Iavg /（mm/h）	I30 /（mm/h）	gradient	run-off depth /mm	runoff coefficient	sediment concentration /（g/L）	soil loss amount /（t/hm2）
Ⅰ	34.5	360	5.8	17	15	7.9	0.228986	14.2	4
Ⅱ	16	680	1.4	13	15	8.00984	0.500615	53.47	9.5698
Ⅰ	13.5	110	7.4	52	15	5.72016	0.423716	82.33	8.86466
Ⅱ	38.2	765	1.51	26.58	15	15.77	0.412827	74.83	7.0035
Ⅰ	61.2	418	8.8	42.4	15	30.9	0.504902	100.43	62.9
Ⅰ	30.4	130	14	18.5	15	13.1666	0.433111	55.3	9.21541
Ⅰ	34.5	360	5.8	17	10	0	0	0	0
Ⅱ	16	680	1.4	13	10	3.46656	0.21666	218.61	7.57825
Ⅰ	13.5	110	7.4	52	10	3.46656	0.256782	179.66	6.22802
Ⅱ	38.2	765	1.51	26.58	10	2.58736	0.0680884	165.03	4.26992
Ⅰ	61.2	418	8.8	42.4	10	4.3	0.100939	0	0
Ⅰ	30.4	130	14	18.5	10	6.85776	0.225584	61.81	2.12205
Ⅰ	34.5	360	5.8	17	5	1.0048	0.0717714	1.62	0.0162778
Ⅱ	16	680	1.4	13	5	5.50128	0.094039	51.02	1.34234
Ⅰ	13.5	110	7.4	52	5	2.11008	0.0844032	1.27	0.026798
Ⅱ	38.2	765	1.51	26.58	5	5.6	0.191781	204	0.88
Ⅰ	61.2	418	8.8	42.4	5	9.06	0.133628	7.89	71.44
Ⅰ	30.4	130	14	18.5	5	6.21	0.1725	1.696	10.53
	Rainfall /mm	T /min	Iavg /（mm/h）	I30 /（mm/h）	gradient	run-off depth /mm	runoff coefficient	sediment concentration /（g/L）	soil loss amount /（t/hm2）
Cultivated-land	34.5	360	5.8	17	10	6.98526	0.202471	6.33	3.00018
	16	680	1.4	13	10	6.2879	0.392994	39.4	6.06684
	13.5	110	7.4	52	10	5.02973	0.372572	37.4	8.42879
	38.2	765	1.51	26.58	10	15.2	0.397906	24.52	6.02646
	61.2	418	8.8	42.4	10	26.81	0.438072	93.61	61.03
	30.4	130	14	18.5	10	12.85	0.422697	10.43	8.1
	34.5	360	5.8	17	5	0.105504	0.00305809	0.4	0.000422016
	16	680	1.4	13	5	0	0	0	0
	13.5	110	7.4	52	5	0	0	0	0
	38.2	765	1.51	26.58	5	0.0292	0.000764398	4.79	0.0014
	61.2	418	8.8	42.4	5	1.06	0.0173203	1.33	1.4
	30.4	130	14	18.5	5	0.05	0.00164474	6.07	0.28

## Sheet: Sheet2
		Run-off depth（mm）	5°	10°	15°	Soil erosion modulus（t/hm2)	5°	10°	15°
	Arbor forest land	Ⅰ	0	0.2	1.2975		0	0	3.8
		Ⅱ	0.1	1	0.625		0.01	0.02	0.04
		Ⅲ	0	0	0.51		0.01	0	0.5
	Shrub grass land	Ⅰ	0.7	0.63762	1.66406		0.013	5.419	8.216
		Ⅱ	0.4	0.9	0.9		0.026	1.076	1.419
		Ⅲ	0	0.1	0.64		0	0	0.59
	Natural grassland	Ⅰ	0.03266	3.17518	7.42047		0	0.544	13.565
		Ⅱ	5.5	5.21424	5.70456		0.158	0.36	0.874
		Ⅲ	0	2.3	4.6		0	0.2	0.68
	Artificial grassland	Ⅰ	0.485	4.13334	7.16864		0.2	8.035	9.256
		Ⅱ	6.6	5.31517	5.99539		0.768	1.067	0.72
		Ⅲ	0	0.8	4.17		0	0.01	0.4
	Cultivated-land	Ⅰ	0.30388	12.9187	12.4		0.42	20.14	20.5
		Ⅱ	0	10.7439	9.83		0.001	6.047	6.7
		Ⅲ	2.1	5.1	6.36		0	4.7	5.2
	Bare land	Ⅰ	4.59622	3.65608	14.4217		20.503	2.088	21.245
		Ⅱ	5.55064	3.02696	11.8899		1.111	5.924	8.287
		Ⅲ	2.1	5.1	9.61		0.01	0.9	5.8
